# Supplementary material for: A high surface area ordered mesoporous BiFeO3 semiconductor with efficient water oxidation activity
Source: Royal Society of Chemistry journal article supplement (doi:10.1039/c4ta05272b), 2014-11-24
Supplement: c4ta05272b1.pdf [file c4ta05272b1.pdf]

*Electronic Supplementary Information*

**High Surface Area Ordered Mesoporous BiFeO<sub>3</sub> Semiconductor with Efficient Water Oxidation Activity**

Ioannis Papadas,<sup>a</sup> Joseph A. Christodoulides,<sup>b</sup> George Kioseoglou<sup>a</sup> and Gerasimos S. Armatas<sup>a,\*</sup>

<sup>a</sup> *Department of Materials Science and Technology, University of Crete, Heraklion GR-71003, Crete, Greece.*

<sup>b</sup> *Naval Research Laboratory, 4555 Overlook Ave SW, Washington, DC 20375, USA.*

\*E-mail: [garmatas@materials.uoc.gr](mailto:garmatas@materials.uoc.gr).

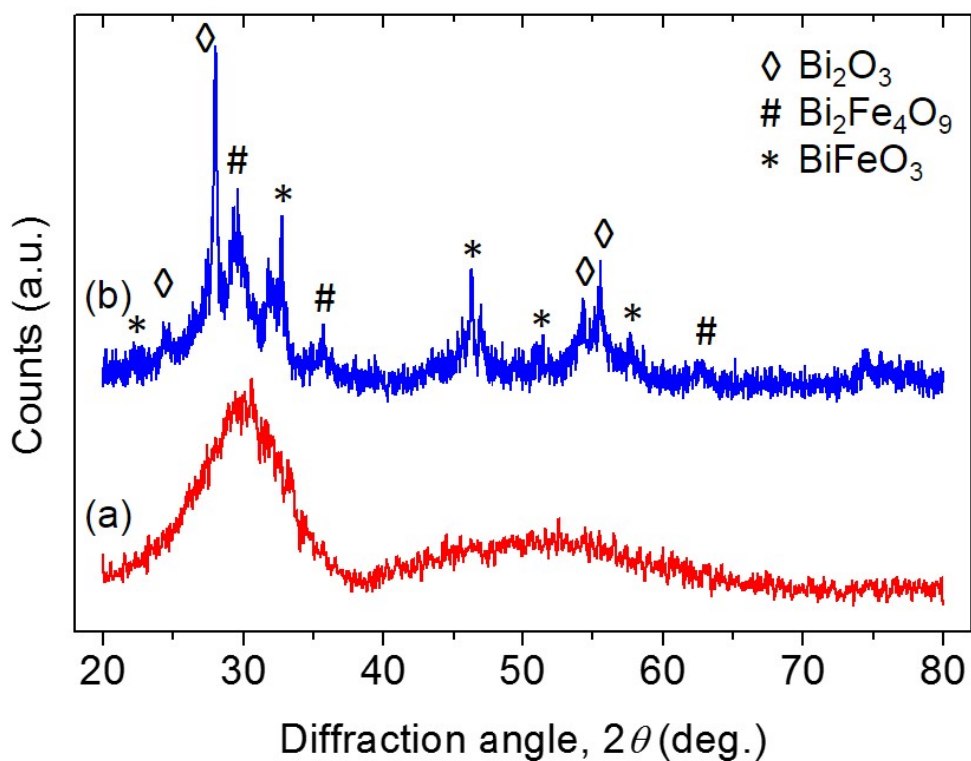

**Fig. S1** XRD pattern of mesostructured frameworks casted from mesoporous CMK-3 carbon, (a) without using tartaric acid along with the  $\text{Bi}(\text{NO}_3)_3$  and  $\text{Fe}(\text{NO}_3)_3$  compounds and (b) using tartaric acid at a 0.5:1 molar ratio with respect to metal ions. The product in (b) is composed of crystalline  $\text{Bi}_2\text{O}_3$ ,  $\text{Bi}_2\text{Fe}_4\text{O}_9$  and  $\text{BiFeO}_3$ .

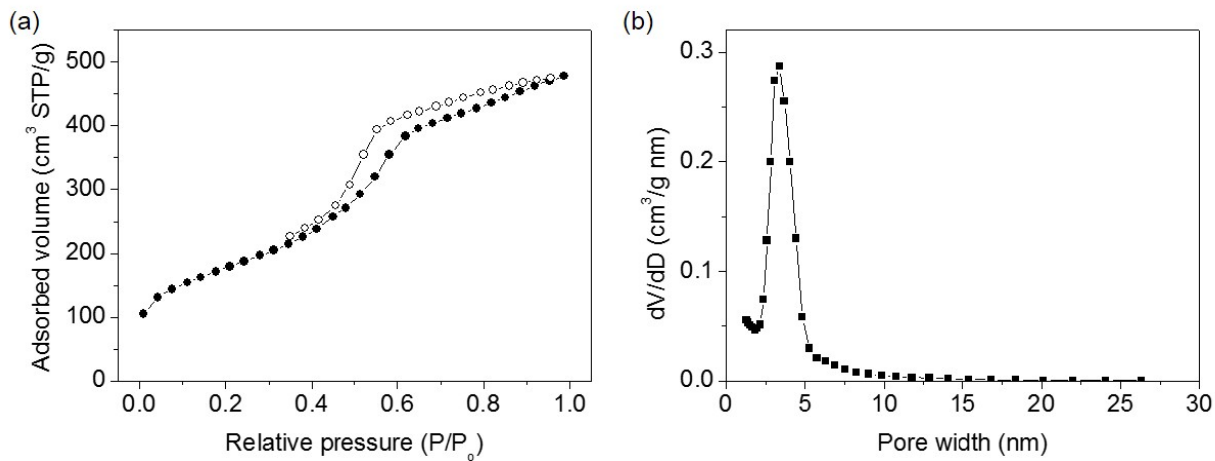

**Fig. S2** (a) Nitrogen adsorption and desorption isotherms at 77 K and (b) the corresponding NLDFT pore size distribution for mesoporous CMK-3 carbon, indicating a mesopore size of 3.2 nm. Analysis of the adsorption data with the BET method gives surface area of  $632 \text{ m}^2\text{g}^{-1}$  and total pore volume of  $0.73 \text{ cm}^3\text{g}^{-1}$ . Given an estimation of the mesopore diameter ( $D_p$ ) at 3.2 nm and the unit cell size ( $a_0$ ) at 9.8 nm, the pore wall thickness (WT) is about 6.6 nm, according to the equation  $WT = a_0 - D_p$ .

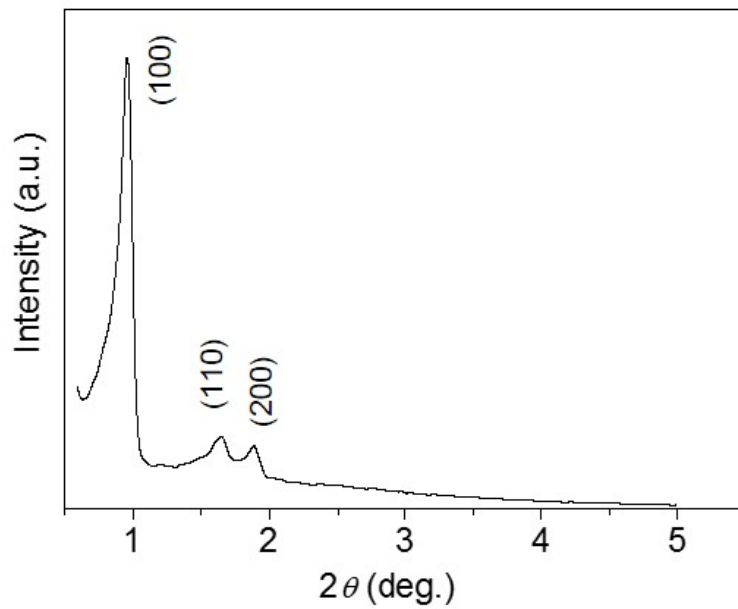

**Fig. S3** Low-angle XRD pattern of mesoporous SBA-15 silica. The indexing of the Bragg diffractions is consisted with a hexagonal  $p6mm$  unit cell with lattice parameter  $a_0=10.7$  nm.

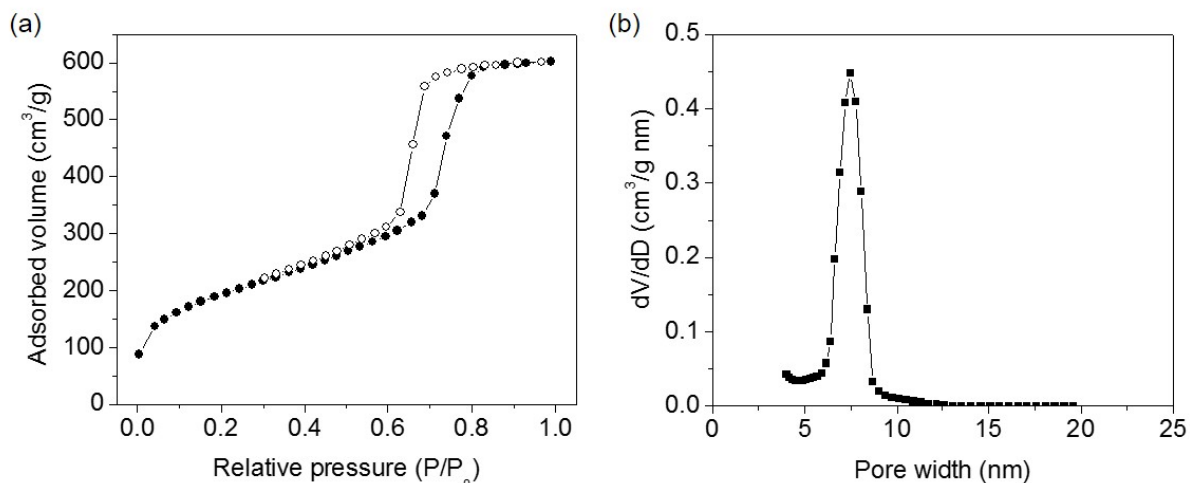

**Fig. S4** (a) Nitrogen adsorption and desorption isotherms at 77 K and (b) the corresponding NLDFT pore size distribution for mesoporous SBA-15 silica, indicating a mesopore size of 7.8 nm. Analysis of the adsorption data with the BET method gives surface area of  $650 \text{ m}^2\text{g}^{-1}$  and total pore volume of  $0.88 \text{ cm}^3\text{g}^{-1}$ . Given an estimation of the mesopore diameter ( $D_p$ ) at 7.4 nm and the unit cell size ( $a_0$ ) at 10.7 nm (see Fig. S3), the pore wall thickness (WT) is about 3.3 nm, according to the equation  $WT = a_0 - D_p$ .

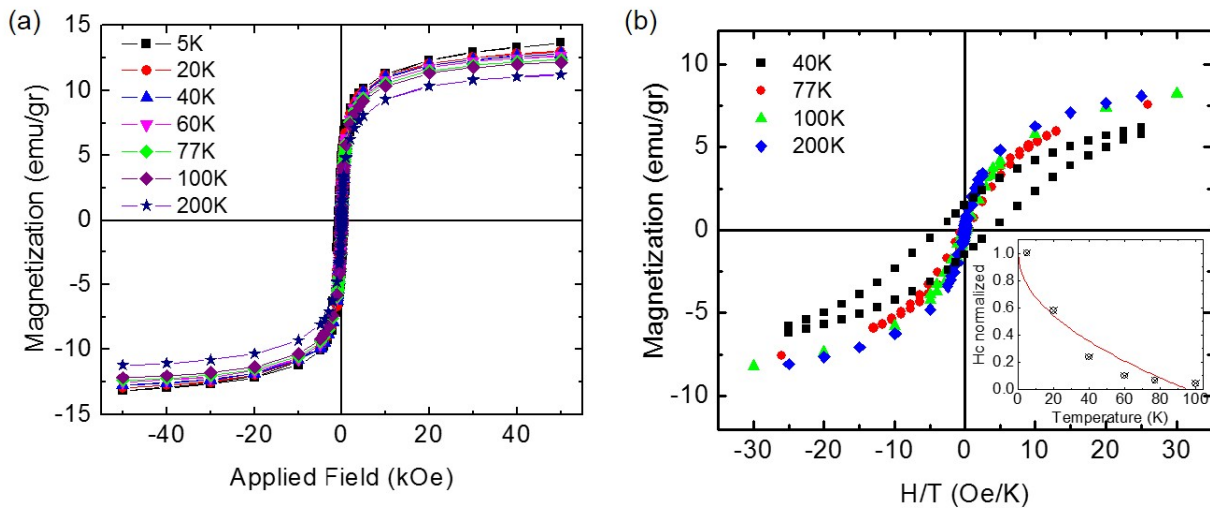

**Fig. S5** (a) M-H loops at different temperatures for mesostructured BiFeO<sub>3</sub> in the -50 to +50 kOe range. Fast saturation of the magnetization is observed. (b) Magnetization plotted as function of H/T in the very narrow range of -35 to +35 Oe for 40, 77, 100 and 200 K. The inset shows the temperature dependence of the coercivity normalized to the value at 5 K. Black points are the experimental data and red line is root square dependence of the coercivity ( $H_c = 1 - (T/T_B)^{1/2}$ ) assuming blocking temperature T<sub>B</sub> = 95 K.

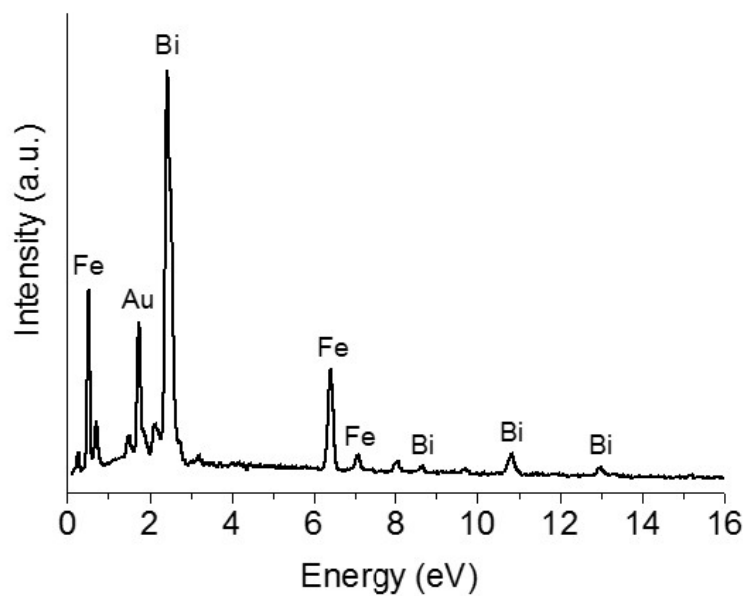

**Fig. S6** Typical EDS spectrum for mesoporous Au/BiFeO<sub>3</sub> photocatalyst. The EDS analysis indicates an average atomic ratio of Au/Bi/Fe ~0.8:49.7:49.5 that corresponds to a ~1 wt % Au loading.

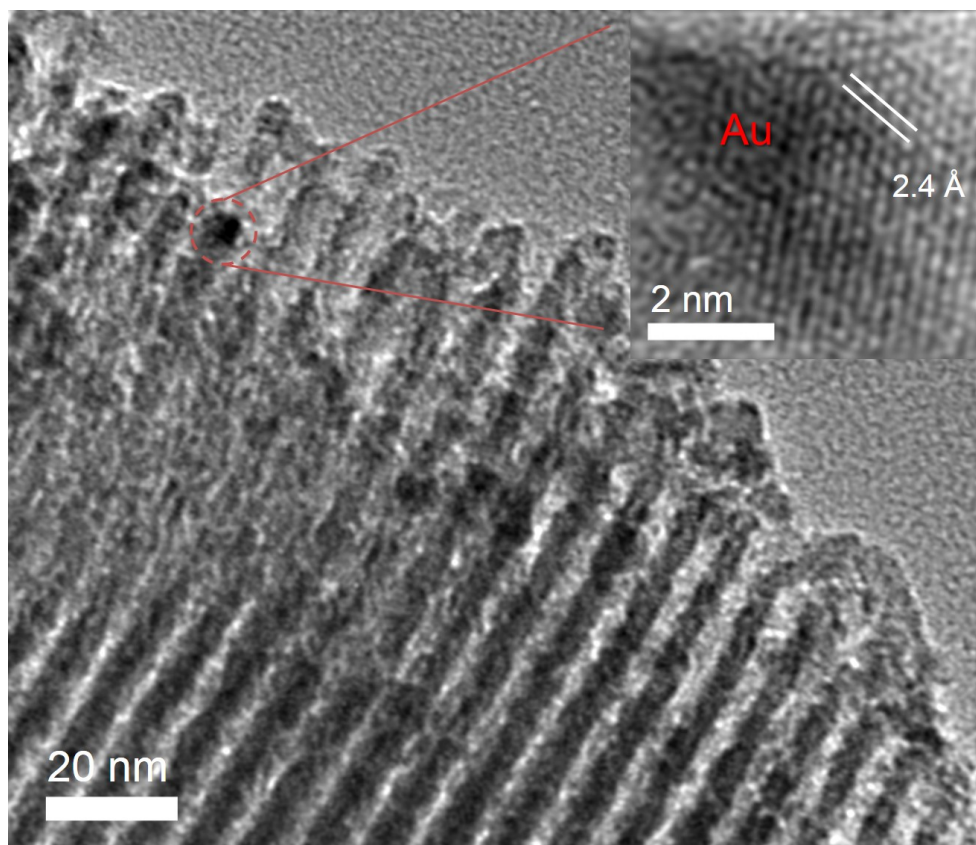

**Fig. S7** Typical TEM image of mesoporous Au/BiFeO<sub>3</sub> sample. The inset shows the HRTEM image of an individual Au nanoparticle. The measured  $d$ -spacing is around 2.4 Å which is in consistent with the Au (111) crystal plane.



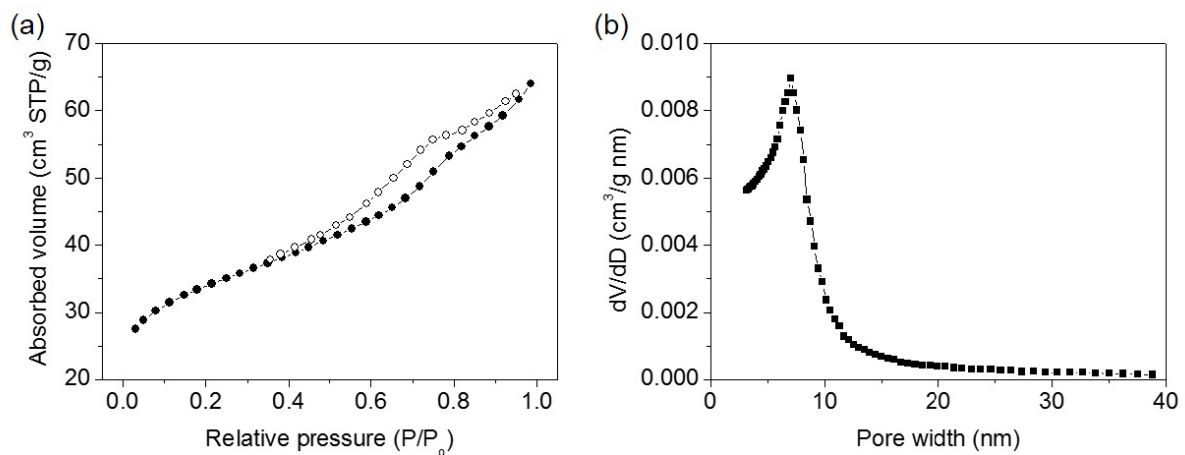

**Fig. S8** (a) Nitrogen adsorption and desorption isotherms at 77 K and (b) the corresponding NLDFT pore size distribution for mesoporous Au/BiFeO<sub>3</sub> photocatalyst. Analysis of the adsorption data with the BET method gives surface area of 116 m<sup>2</sup>g<sup>-1</sup> and total pore volume of 0.10 cm<sup>3</sup>g<sup>-1</sup>. The NLDFT analysis of the adsorption data indicates a mesopore size of 7.0 nm.

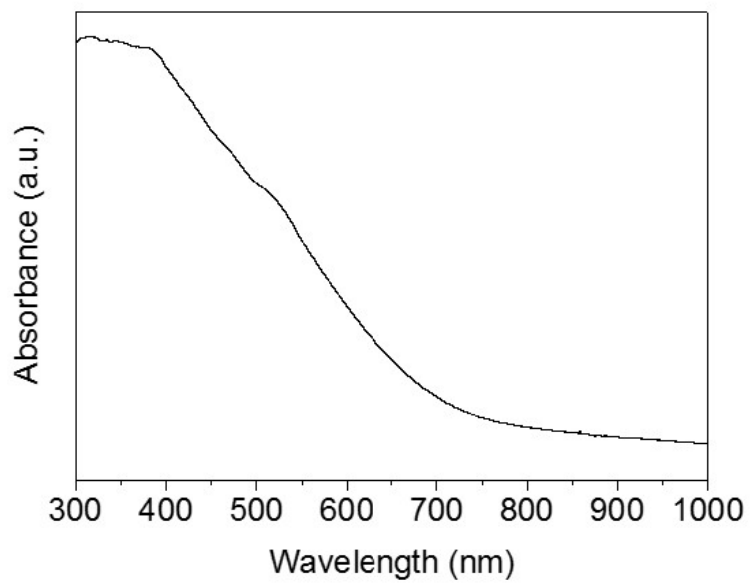

**Fig. S9** UV-Vis/NIR absorption spectrum of mesoporous Au/BiFeO<sub>3</sub> heterostructure.

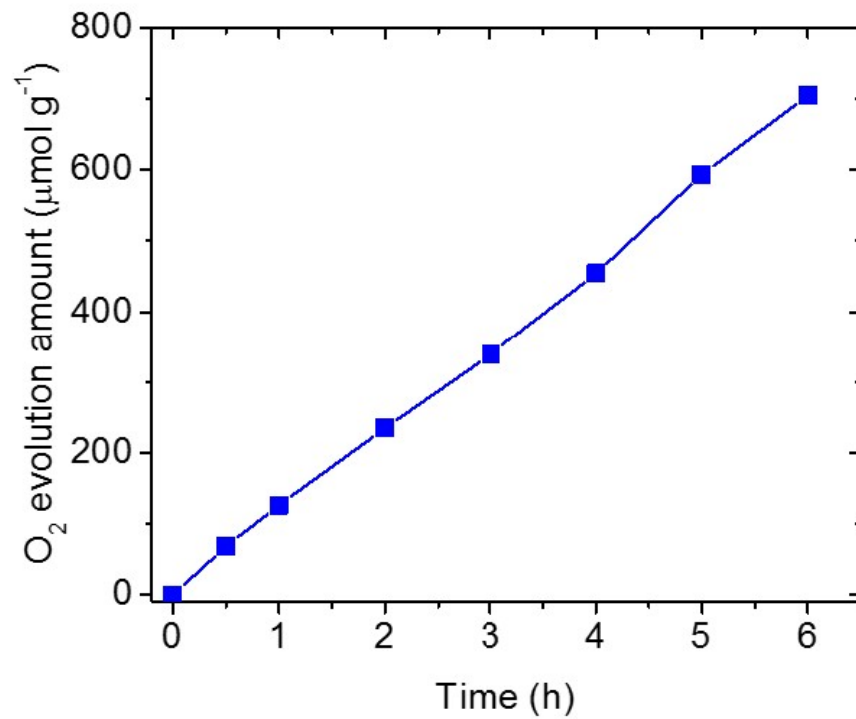

**Fig. S10** Oxygen evolution profile for mesoporous Au/BiFeO<sub>3</sub> under visible light irradiation, showing a O<sub>2</sub> evolution rate of ~120 μmol h<sup>-1</sup> g<sup>-1</sup>.
